# Supplementary material for: Present and Future of Parkinson’s Disease in Spain: PARKINSON-2030 Delphi Project
Source: MDPI journal article supplement (doi:10.3390/brainsci11081027), 2021-07-31
Supplement: s1 [file s1]

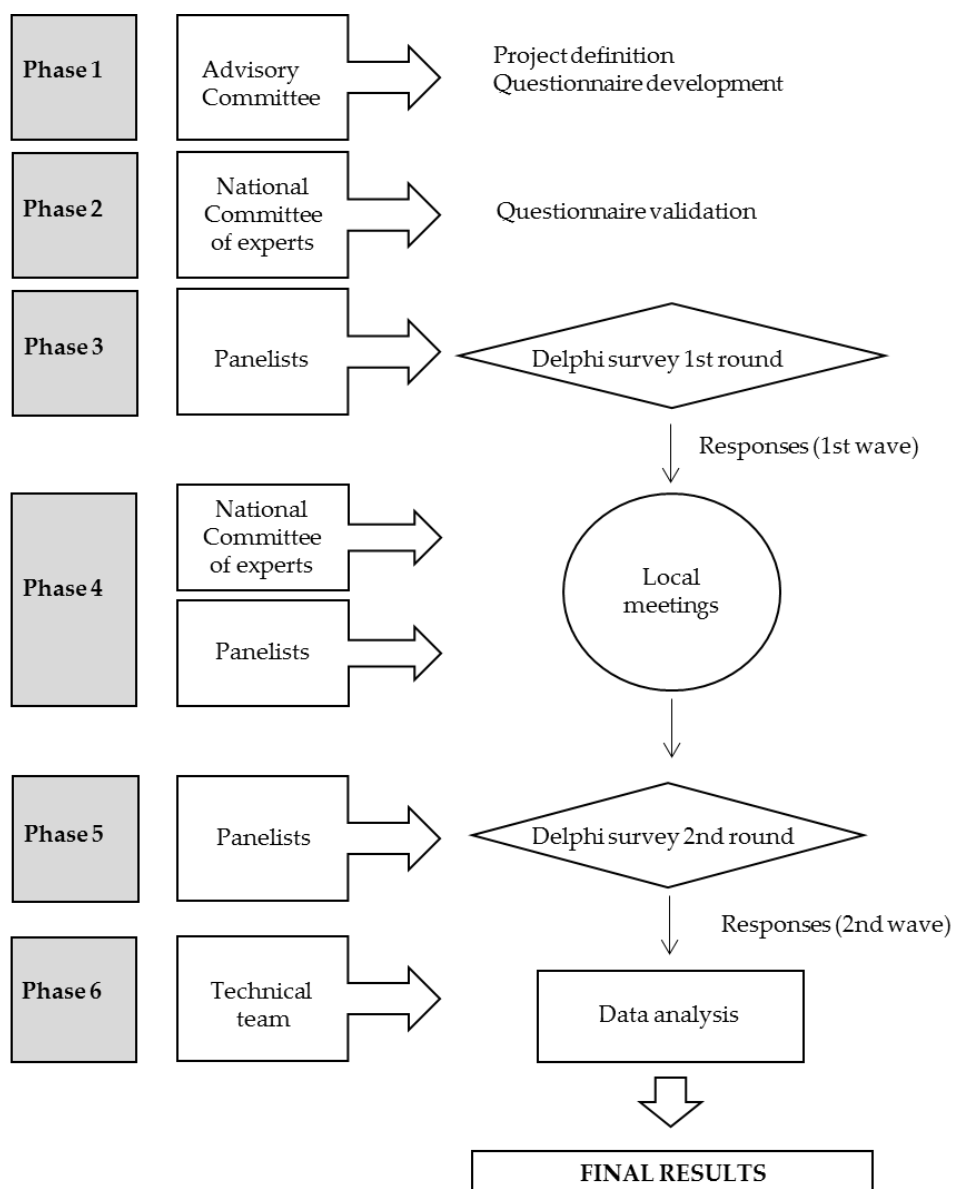

**Figure S1.** Flow chart of the study.

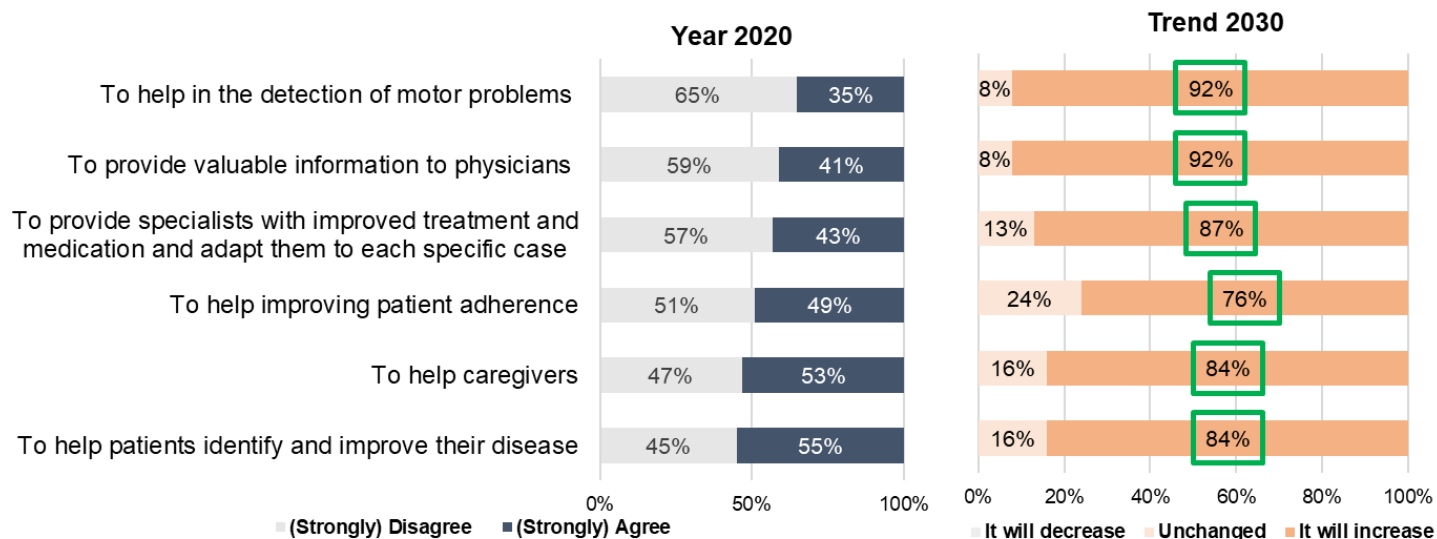

**Figure S2.** Contribution of new technologies for PD monitoring: present and future

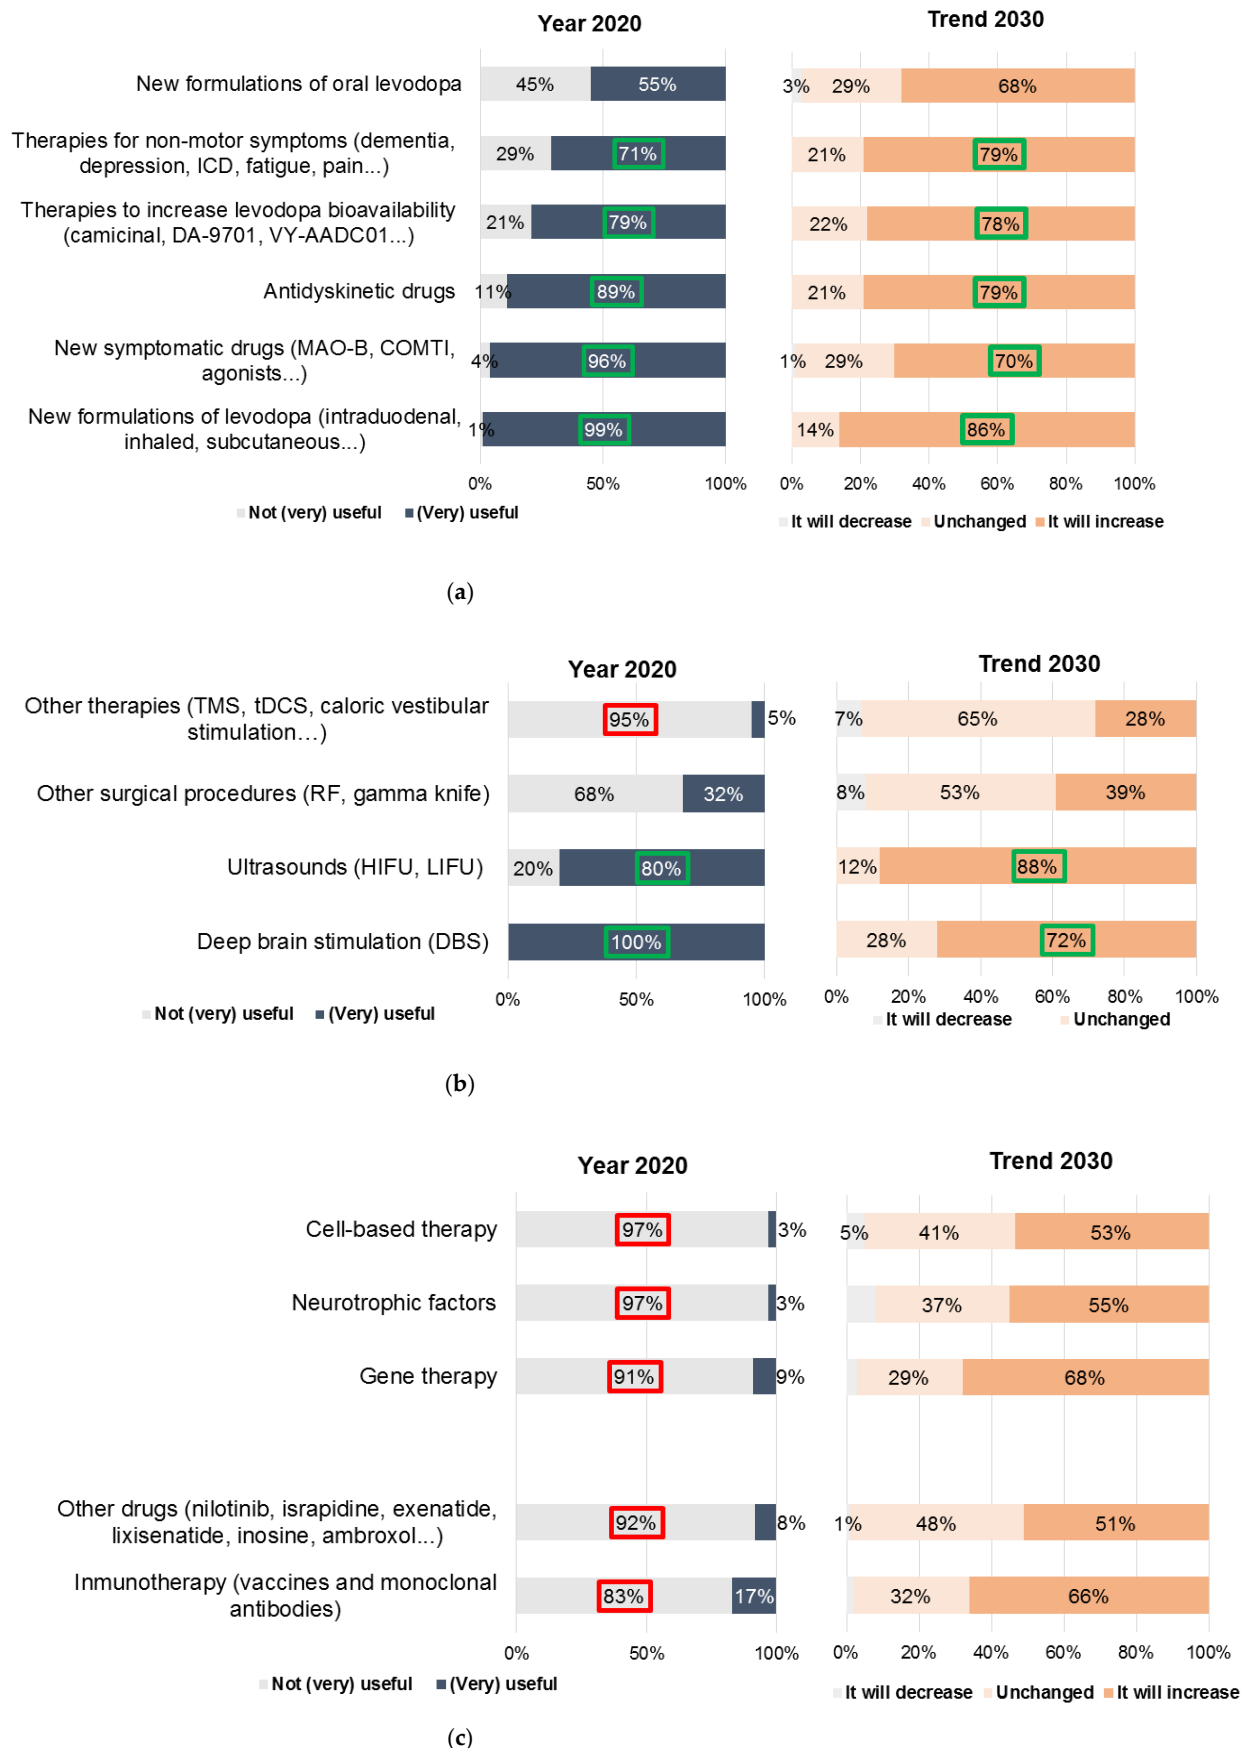

**Figure S3.** Investigational therapies of PD: present and future. **(a)** Perceived utility of pharmacological investigative therapies. COMTI: catechol-O-methyltransferase inhibitors. ICD: impulse control disorders. MAO-B: monoamine oxidase B; **(b)** Perceived utility of non-pharmacological investigative therapies. HIFU: high-intensity focused ultrasound. LIFU: low-intensity focused ultrasound. RF: radiofrequency. tDCS: transcranial direct current stimulation. TMS: transcranial magnetic stimulation; **(c)** Perceived utility of disease-modifying and curative investigative therapies.

**Table S1. List of participating panelists**

| <b>Surname, Name</b>               |
|------------------------------------|
| Alonso Cánovas, Araceli            |
| Alonso Frech, Fernando             |
| Álvarez Sauco, María               |
| Aneiros Díaz, Ángel                |
| Arias Rodríguez, Mónica            |
| Ávila Rivera, Asunción             |
| Berganzo Corrales, Koldo           |
| Caballo Pons, Núria                |
| Cabello de la Rosa, Juan Pablo     |
| Cabo López, Iria                   |
| Campdelacreu Fumadó, Jaume         |
| Carrillo García, Fátima María      |
| Cimas Hernando, Iciar              |
| Claramonte Clausell, Berta         |
| Clavero Ibarra, Pedro              |
| De la Casa Fages, Beatriz          |
| Delgado Alvarado, Manuel           |
| Delgado Ballester, Tania           |
| Errea Abad, José María             |
| Escalante Arroyo, Sonia            |
| Espinosa Rosso, Raúl               |
| Fernández García, José Manuel      |
| Fernández Moreno, María Del Carmen |
| Fernández Pajarín, Gustavo         |
| Fernández Villalba, Emiliano       |
| García Caldentey, Juan             |
| García Fernández, Ciara            |
| García Trujillo, Lucía             |
| Gómez Heredia, María José          |
| Gómez Llopico, Roser               |
| González Torres, Verónica          |
| Gutiérrez García, Javier           |
| Hernández Rubio, Lidia             |
| Herreros Rodríguez, Jaime          |
| Infante Ceberio, Jon               |
| Ispuerto González, Lourdes         |
| Jaumà Classen, Serge               |
| Jesús Maestre, Silvia              |
| Llanero Luque, Marcos              |
| López Ariztegui, Nuria             |
| Lopez del Val, Luis Javier         |
| Lorenzo Brito, Jesús Norelis       |
| Martí Martínez, Silvia             |
| Martín Bastida, Antonio            |

|                                      |
|--------------------------------------|
| Martínez Fernández, Raúl             |
| Moragues Benito, María Dolores       |
| Muñoz Ruiz, Teresa                   |
| Ochoa Sepúlveda, Juan José           |
| Olivares Romero, Jesús               |
| Ordás Bandera, Carlos M.             |
| Oropesa Ruiz, Juan Manuel            |
| Paz González, José Manuel            |
| Peña Llamas, Esteban                 |
| Perona Moratalla, Ana Belén          |
| Pinel Ríos, Javier                   |
| Pont Sunyer, Claustre                |
| Puente Periz, Víctor                 |
| Pueyo Morlans, Mercedes              |
| Rodríguez Sanz, Ana                  |
| Rojo Sebastián, Ana                  |
| Ruiz Bajo, Blanca                    |
| Ruiz López, Marta                    |
| Ruiz Martínez, Javier                |
| Sanchez Alonso, Pilar                |
| Sanz Cartagena, M <sup>a</sup> Pilar |
| Sierra Peña, María                   |
| Solano Vila, Berta                   |
| Suárez Muñoz, José A.                |
| Suárez San Martín, María Esther      |
| Turpin Fenoll, Laura                 |
| Valero Merino, Caridad               |
| Vázquez Picón, Raquel                |
| Vega Pérez, Jesús Manuel             |
| Vela Desojo, Lydia                   |
| Vives Pastor, Bárbara                |

**Table S2.** Panelists' descriptions

| Characteristic                   | n=75        |
|----------------------------------|-------------|
| Gender, n (%)                    |             |
| Male                             | 44 (58%)    |
| Female                           | 31 (42%)    |
| Age, n (%)                       |             |
| 25-35 years                      | 11 (15%)    |
| 36-45 years                      | 32 (42%)    |
| 46-55 years                      | 24 (32%)    |
| >55 years                        | 8 (11%)     |
| Workplace*, n (%)                |             |
| Primary                          | 3 (4%)      |
| Secondary                        | 17 (22%)    |
| Tertiary                         | 55 (74%)    |
| Years of experience<br>mean (SD) | 14.3 (8.2)  |
| Geographical distribution, n (%) |             |
| Andalusia                        | 14 (18.67%) |
| Aragon                           | 2 (2.67%)   |
| Asturias                         | 3 (4.0%)    |
| Balearic Islands                 | 3 (4.0%)    |
| Basque Country                   | 5 (6.67%)   |
| Cantabria                        | 3 (4.0%)    |
| Castilia La Mancha               | 3 (4.0%)    |
| Catalonia                        | 12 (16.0%)  |
| Canary Islands                   | 3 (4.0%)    |
| Galicia                          | 5 (6.67%)   |
| Madrid, Community of             | 14 (18.67%) |
| Murcia, Region of                | 2 (2.67%)   |
| Navarra                          | 1 (1.33%)   |
| Valencian Community              | 5 (6.67%)   |

\* Primary (hospitals that carry out promotion and prevention activities, Local Health Plan activities, general medical consultations, general dentistry, clinical laboratory and low complexity imaging, hospitalization, emergency care and low complexity childbirth). Secondary (hospitals that carry out outpatient medical consultations, hospitalization and emergency care of basic specialties, medium complexity childbirth and cesarean section care, general and specialized dental care, nutrition, psychology, optometry and support therapies for functional rehabilitation). Tertiary (hospitals that provide medical care aimed at restoring health and rehabilitating patients referred by primary and secondary hospitals, who present conditions of high diagnostic and treatment complexity that involve one or more medical, surgical or medical-surgical specialties).
